# Supplementary material for: The circular RNA hsa_circ_0003091 regulates sepsis-induced lung injury by sponging the miR-149/Smad2 axis
Source: publisher site journal article supplement (doi:10.18632/aging.204125), 2022-06-14
Supplement: Supplementary file [file aging-v14-204125-supplementary-material-SD1.pdf]

SUPPLEMENTARY FIGURES

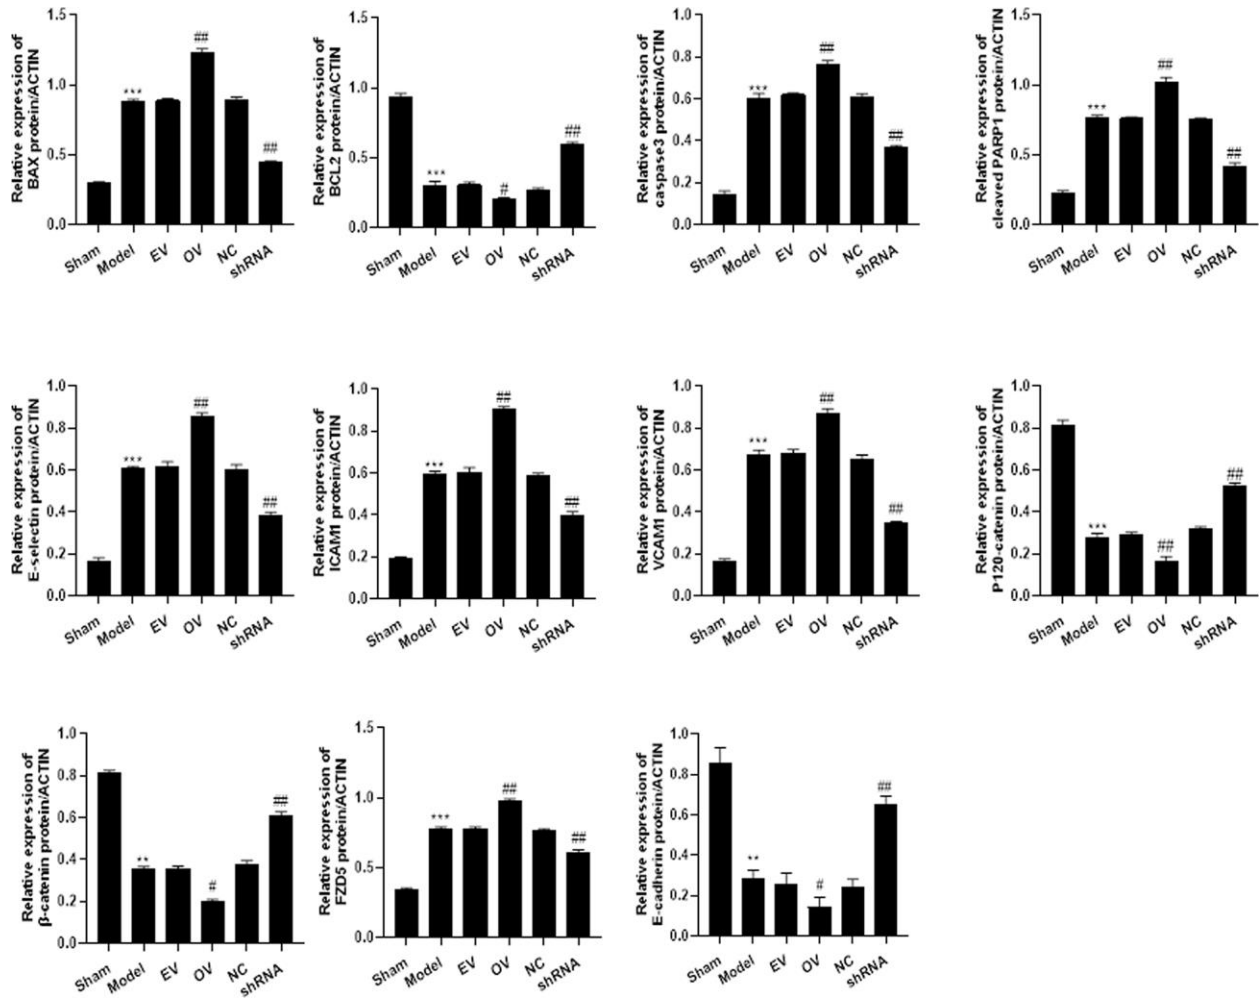

Supplementary Figure 1. Quantification of each protein level.

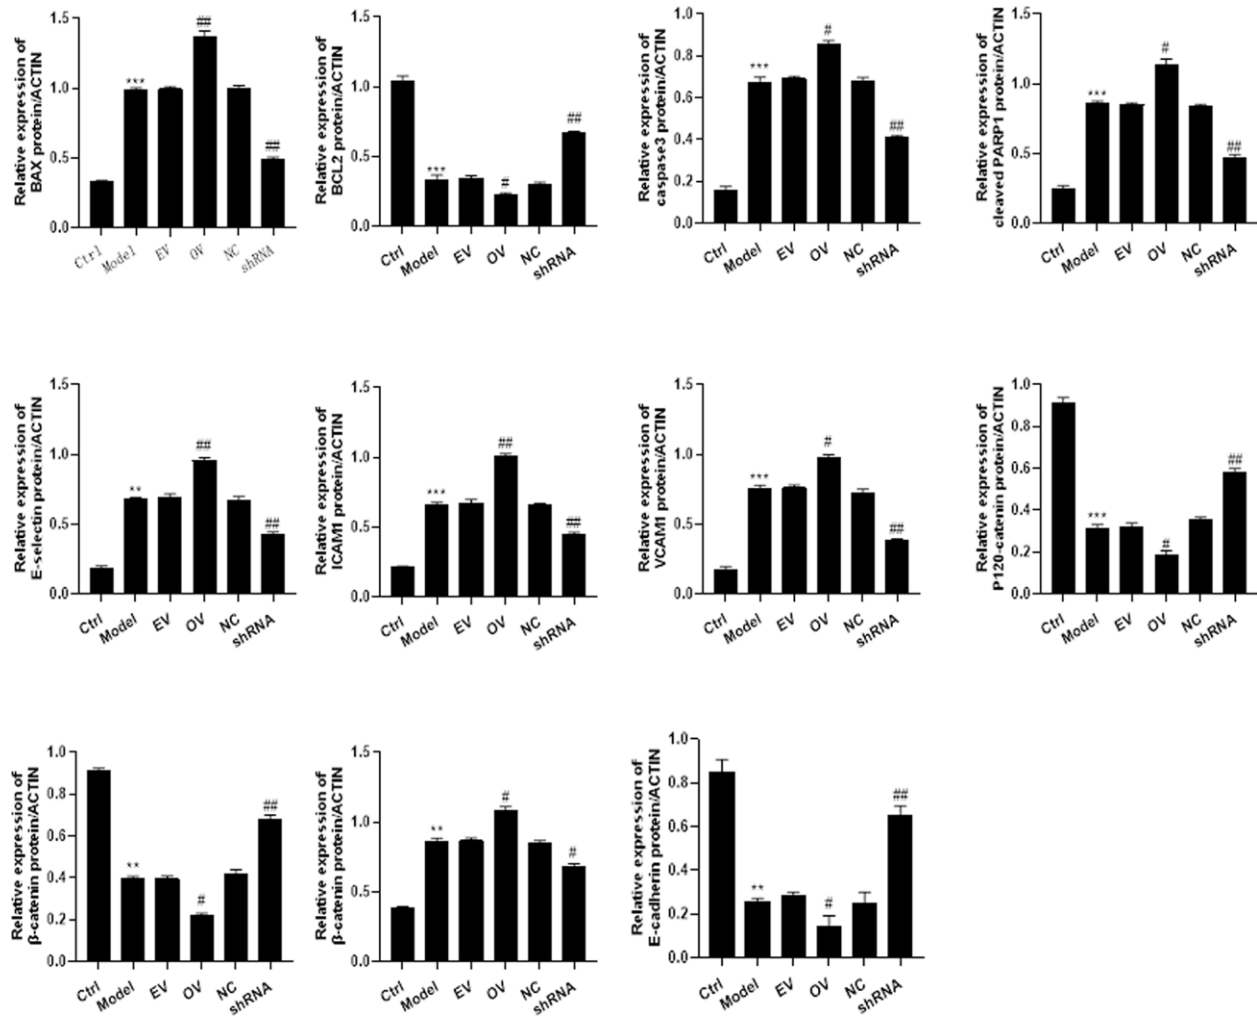

Supplementary Figure 2. Quantification of each protein level.

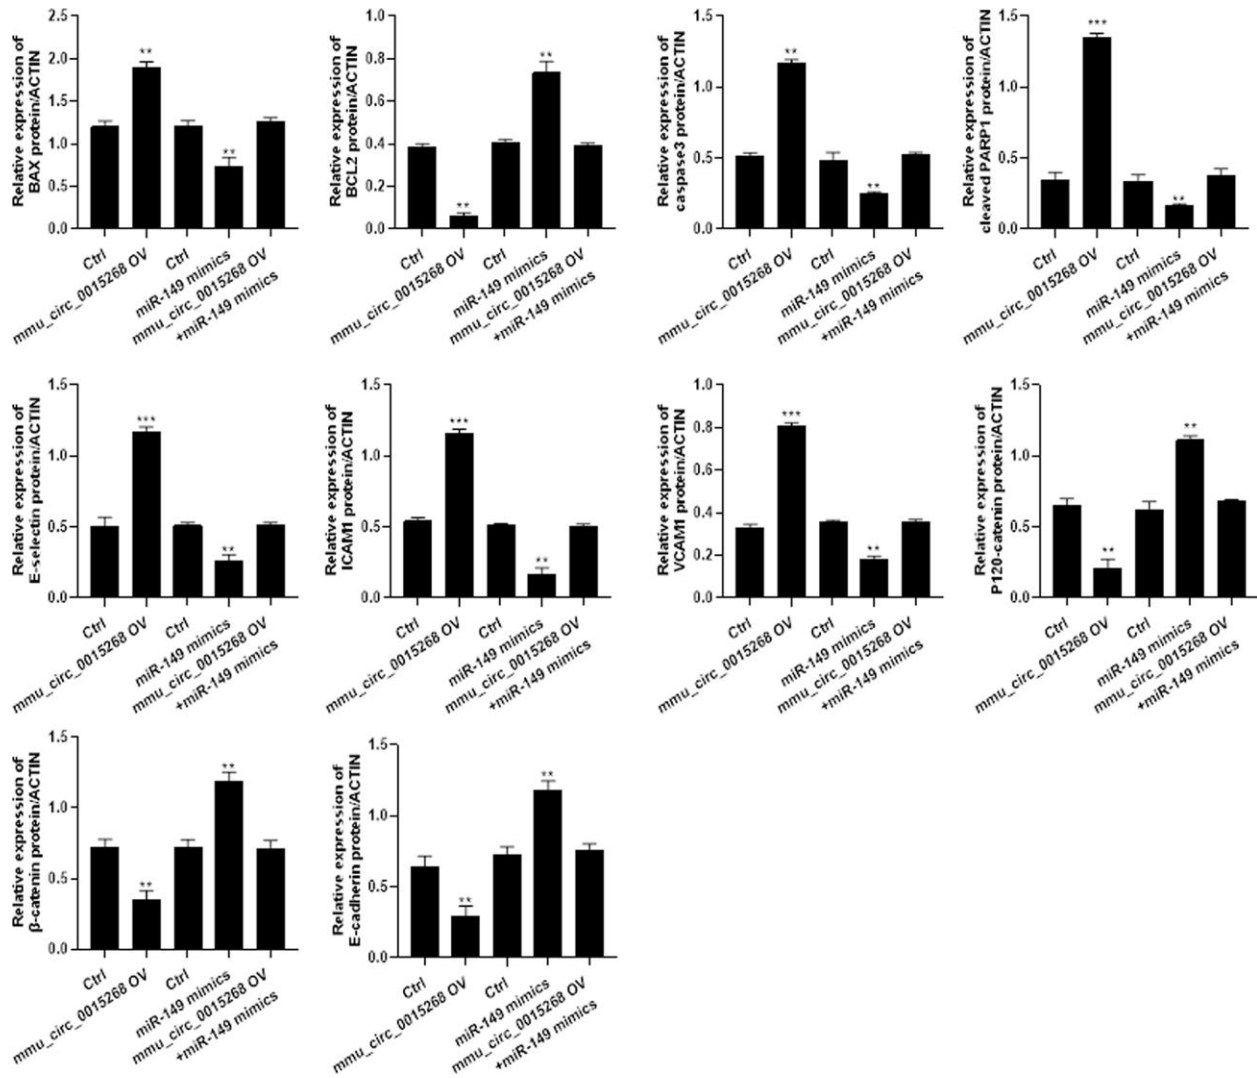

Supplementary Figure 3. Quantification of each protein level.
